# Supplementary material for: BAP1 dependent expression of long non-coding RNA NEAT-1 contributes to sensitivity to gemcitabine in cholangiocarcinoma
Source: PubMed Central journal article supplement (PMC5264287; doi:10.1186/s12943-017-0587-x), 2017-01-25
Supplement: 12943_2017_587_MOESM1_ESM.pdf [file 12943_2017_587_MOESM1_ESM.pdf]

siRNA modulation of BAP1 or NEAT-1

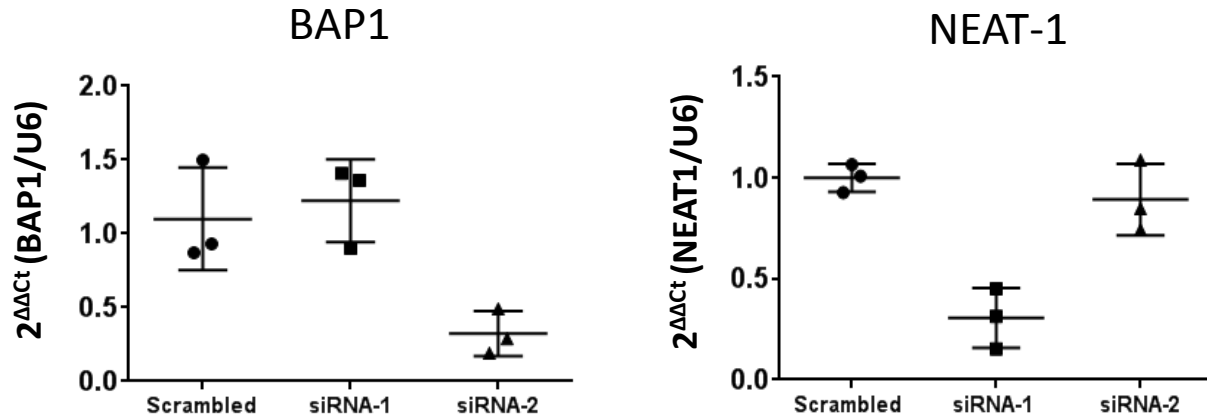

siRNA to BAP1

siRNA-1: CAGCAGCTGATAAGAGATAACA

siRNA-2: CTCAATTCCTCTGTCCATCAA

siRNA to NEAT1

siRNA-1: TTGCCTATCTAGTATCTTCAA

siRNA-2: GCCGGGAGGGCTAATCTTCAA
