# Supplementary material for: BAP1 dependent expression of long non-coding RNA NEAT-1 contributes to sensitivity to gemcitabine in cholangiocarcinoma
Source: PubMed Central journal article supplement (PMC5264287; doi:10.1186/s12943-017-0587-x), 2017-01-25
Supplement: 12943_2017_587_MOESM2_ESM.pdf [file 12943_2017_587_MOESM2_ESM.pdf]

**Additional file 2: Supplementary Tables**

**Expression of BAP1 modulates expression of long non-coding RNA NEAT-1 and contributes to sensitivity to gemcitabine in a BAP1-dependent manner in cholangiocarcinoma**

Mansi Parasramka, PhD, Irene K. Yan, Xue Wang, PhD, Phuong Nguyen, Akiko Matsuda, MD, PhD, Sayantan Maji, PhD, Catherine Foye, Yan Asmann, PhD, Tushar Patel, MBChB

**Table 1: BAP1 primer sequences for Sanger sequencing**

| <b>Region</b>                            | <b>Primer sequence</b>                         |
|------------------------------------------|------------------------------------------------|
| <b>BAP1 ex123F</b><br><b>BAP1 ex123R</b> | GACTCTGTGTGTGGGACTGAG<br>AAGTATCAGTTTGATCAGGAG |
| <b>ex 4F</b><br><b>ex 4R</b>             | TTATGCTTTGCTCTGCCTG<br>TATCTCCTCCTCCTGTCTTCC   |
| <b>ex5F</b><br><b>ex5R</b>               | GACCAAAGATGAAAGGAGCTG<br>ATGGTCTGACTTAAGGAAAC  |
| <b>ex678F</b><br><b>ex678R</b>           | GACTCCACCCATAGTCCTACC<br>GAACCCATGATCTAAGCC    |
| <b>ex9F</b><br><b>ex9R</b>               | GACAGGTCTGCTGGTTCACTTC<br>ATAATGGCCTTGGCTCTAC  |
| <b>ex10F</b><br><b>ex10R</b>             | GACTTCCTTTAGGTCCTCAGC<br>TTTAGGGAAGGACTGCTC    |
| <b>ex11F</b><br><b>ex11R</b>             | TTTGCCCTGTCTCATTGC<br>ACATTTAATCCCACAGCCAC     |
| <b>ex12F</b><br><b>ex12R</b>             | GACCAAGGACAGGCCATGGAAC<br>AACTCCGCAGGTGCTCAAC  |
| <b>ex13F</b><br><b>ex13R</b>             | GACATGGCTAGTTCAAGTTGC<br>AAATCATCAGAGTGCAGG    |
| <b>ex14F</b><br><b>ex14R</b>             | GACTTTGGAGAGGATGACAGC<br>AAGTCTTCTGGCACATGG    |
| <b>ex1516F</b><br><b>ex1516R</b>         | GACTTCTCCTTTAATCCTGGCAG<br>AGAGACCCTTGAGCAGGTG |
| <b>ex17F</b><br><b>ex17R</b>             | GACTGTCTTAACTGGAATGCC<br>GAATGAAGAGAGAAGACCTG  |

**Table 2: qPCR primer sequences**

| <b>Identifier</b>                                                                    | <b>Amplicon length</b> | <b>Forward primer</b>               | <b>Reverse primer</b>              |
|--------------------------------------------------------------------------------------|------------------------|-------------------------------------|------------------------------------|
| <b>BAP1</b> , NG_031859                                                              | 103                    | 5'GCCTGAGGAGTCCAAGTCAG3'            | 5'CTGGAGGCTTCACCACTAGC3'           |
| <b>Total NEAT1: NEAT1_1</b><br>(NR_131012) <b>and</b><br><b>NEAT1_2</b> ( NR_028272) | 160                    | 5'GACGAGATTAGATGGGCTCTT<br>CTG3'    | 5'CGACCAAACACAGAAAAGACA<br>ACA3'   |
| <b>NEAT1_1</b> , NR_131012                                                           | 130                    | 5'CAGTTAGTTTATCAGTTCTCCC<br>ATCCA3' | 5'GTTGTTGTTCGTCACCTTTCAAC<br>TCT3' |
| <b>NDM29</b>                                                                         | 98                     | 5'GGCAGGCGGGTTGCTT3'                | 5'CCACGCCTGGCTAAGTTTTG3'           |
| <b>SNHG4</b> , NR_003141                                                             | 132                    | 5'CCCATCTGAAGGGAGGAAATA<br>G3'      | 5'GGGTCCTGATGGAGGTAGAT3'           |
| <b>MER11C</b>                                                                        | 108                    | 5'AAACTTGCTGATTTTGTGGCTT<br>3'      | 5'TGTTGGCTGGTCTGTGAAATA3'          |
| <b>U6</b> , NR_004394                                                                | 83                     | 5'CTCGCTTCGGCAGCACAA3'              | 5'AACGCTTCACGAATTTGCGT3'           |
| <b>Beta-actin</b> NC_000007.14                                                       | 87                     | 5'GGACTTCGAGCAAGAGATGG3'            | 5'AGCACTGTGTTGGCGTACAG3'           |

**Table 3: BAP1 mutation status in CCA cell lines**

| <b>Cell line</b> | <b>Mutation type</b> | <b>Location</b> | <b>Position</b> | <b>Amino acid</b> | <b>Database</b> |
|------------------|----------------------|-----------------|-----------------|-------------------|-----------------|
| HuCCT1           | Heterozygous         | Intron 4        | G>A             |                   | rs3821840       |
| KMBC             | Homozygous           | Intron 8        | A               |                   |                 |
| CCLP1            | Heterozygous         | Exon 15         | 1946 G>A        | 649 Cys>Tyr       | rs151308667     |
| MzChA1           | Homozygous           | Exon 1          | 31 G>A          | 11 Asp>Asn        |                 |
|                  | Heterozygous         | Exon 13         | 1583 C>A        | 528 Ser>Tyr       |                 |
|                  | Homozygous           | 3'UTR           | C>T             |                   |                 |

**Table 4: HAP1 BAP1 CRISPR/Cas9 Knockout**

---

| <b>Forward Primer</b>     | <b>Reverse Primer</b>     | <b>Sequencing Primer</b>  |
|---------------------------|---------------------------|---------------------------|
| CAATATCATGTGGTAGCATTCCCAG | AACATTAGGCAAAGATGAAAGGAGC | AACATTAGGCAAAGATGAAAGGAGC |

---

**Sequencing Result**

AGGATGAAGGCACTGCAGCCTACCTCAGGGCTGAAACCCCTGNTGAAGTCCTTCATGCGACTCAGGGTGGGTCCCAGGTCC  
ACGCTGCTGCAGTTCAGGAGCACGCTCAAATCAATGGAGTTCCCGAAAGTCCATGCATTCTACTCTCACGACAATGGATTCA  
TTCCAAAAGGAGCATCTTGTGGGAGCCGCCTCCCTTTACAGGCATTACCCCAAGCAAGGCATGAGTTGCACAAGAGTTGG  
GTATCAGCTGTGAAACCAAGAATAGTCACCCATACACAGCACCCCTCACTGCAAGCCCCAAGCCATATACATCAAGAATGG  
GGATCCAGAGCAGGTCAGTCATATCTGGACAACTCCCCTTCTCAGCTCCTTTCATCTT

---

**Table 5: R<sup>2</sup> value - Coefficient of Determination**

| Drug                  | HuCCT1 | KMBC | HAP1 WT | HAP1 BAP1 KO |
|-----------------------|--------|------|---------|--------------|
| <b>Gemcitabine</b>    | 0.92   | 0.97 | 0.95    | 0.94         |
| <b>Cisplatin</b>      | 0.60   | 0.87 | 0.92    | 0.97         |
| <b>Trichostatin A</b> | 0.95   | 0.81 | 0.95    | 0.96         |
| <b>Olaparib</b>       | 0.91   | 0.84 | 0.91    | 0.97         |
| <b>GSK126</b>         | 0.88   | 0.79 | 0.94    | 0.94         |
| <b>b-AP-15</b>        | 0.91   | 0.95 | 0.92    | 0.95         |

**Table 6: LncRNA expression profile in exogenously modulated BAP1 cells**

| <b>LncRNA</b> | <b>si-BAP1 KD</b> | <b>c-BAP1-KD</b> |
|---------------|-------------------|------------------|
| MER11C        | 56.6              | 7.0              |
| NDM29         | 15.3              | 9.9              |
| NEAT-1        | 17.4              | 7.8              |
| SNHG4         | 5.9               | 6.4              |
