# Supplementary material for: BAP1 dependent expression of long non-coding RNA NEAT-1 contributes to sensitivity to gemcitabine in cholangiocarcinoma
Source: Springer Nature journal article supplement (doi:10.1186/s12943-017-0587-x), 2017-01-25

## Expression of NEAT1 in CCA cells

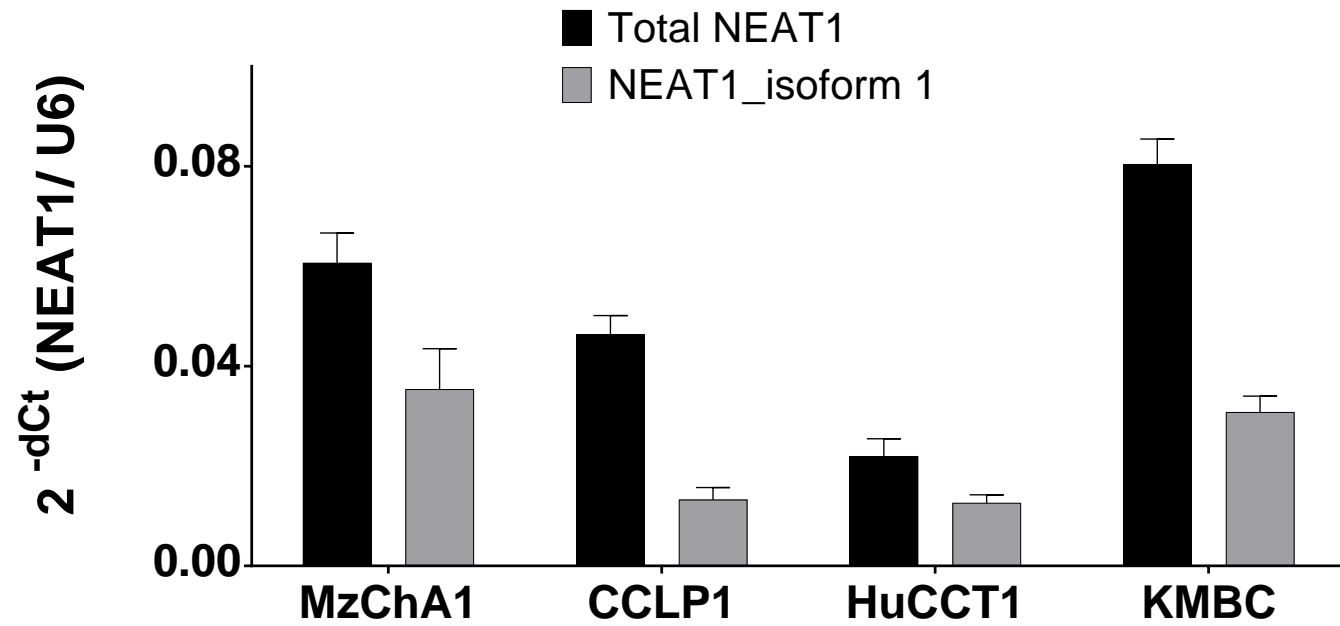

Supplement: MOESM3 [file 12019202]
